# Supplementary material for: For Whom and What Does Cognitive Reappraisal Help? A Prospective Study
Source: Springer Nature journal article supplement (doi:10.1007/s10608-023-10407-3), 2023-09-15
Supplement: MOESM1 [file 26050310]

**Conflict of Interest Disclosure for:**

**For Whom and What Does Cognitive Reappraisal Help? A Prospective Study**

*As submitted to Cognitive Therapy and Research 29 March 2023.*

**Funding:** This research was funded by an internal grant from The Australian National University (ANU) College of Health and Medicine. AD is supported by an ANU College of Health and Medicine TRANSFORM Career Development Fellowship. LMF is supported by ARC DECRA DE190101382. ALC is supported by NHMRC Fellowship 1173146. **Conflict of interest:** The authors declare that they have no conflict of interest. **Corresponding author:** \*Correspondence concerning this article should be addressed to Amy Dawel, School of Medicine and Psychology, The Australian National University, Canberra, ACT 2600, Australia. Email:

[amy.dawel@anu.edu.au](mailto:amy.dawel@anu.edu.au) **Ethics approval:** This study was performed in line with the principles of the Declaration of Helsinki. Approval was granted by the Ethics Committee of the Australian National University (protocol 2020/152). **Consent to participate:** Informed consent was obtained from all individual participants included in the study. **Consent to publish:** The participant consent procedure included consent to publish data without any individually identifying information. **Data availability:** Due to the sensitive nature of some of the data collected in this study, the ethics protocol does not allow open access to the full dataset. However, data can be provided directly to other researchers who propose studies in line with the original protocol, and the authors are committed to providing the data used in the current study to any researcher who wishes to check or reanalyse our findings.

Signed by Dr Amy Dawel on behalf of all coauthors:



29/03/2023
