# Supplementary material for: For Whom and What Does Cognitive Reappraisal Help? A Prospective Study
Source: Springer Nature journal article supplement (doi:10.1007/s10608-023-10407-3), 2023-09-15
Supplement: MOESM2 [file 26050310]

**Supplement 2 for:****For Whom and What Does Cognitive Reappraisal Help? A Prospective Study**

Amy Dawel\*<sup>1</sup>, Paige Mewton<sup>1</sup>, Amelia Gulliver<sup>2</sup>, Louise M. Farrer<sup>2</sup>, Alison L. Calear<sup>2</sup>, Eryn Newman<sup>1</sup>, and Nicolas Cherbuin<sup>3</sup>

<sup>1</sup>School of Medicine and Psychology, The Australian National University, Canberra, ACT, Australia.

<sup>2</sup>Centre for Mental Health Research, National Centre for Epidemiology and Population Health, The Australian National University, Canberra, ACT, Australia.

<sup>3</sup>National Centre for Epidemiology and Population Health, The Australian National University, Canberra, ACT, Australia.

**Author Note**

This research was funded by an internal grant from The Australian National University (ANU) College of Health and Medicine. AD is supported by an ANU College of Health and Medicine TRANSFORM Career Development Fellowship. LMF is supported by ARC DECRA DE190101382. ALC is supported by NHMRC Fellowship 1173146. We have no conflicts of interest to disclose. \*Correspondence concerning this article should be addressed to Amy Dawel, School of Medicine and Psychology, The Australian National University, Canberra, ACT 2600, Australia. Email: [amy.dawel@anu.edu.au](mailto:amy.dawel@anu.edu.au)

**Table of Contents**

|                                                            |          |
|------------------------------------------------------------|----------|
| <b><i>Supplement S1: Sampling</i></b> .....                | <b>3</b> |
| <b><i>Supplement S2: Post-hoc Power Analyses</i></b> ..... | <b>4</b> |
| Table S2a .....                                            | 4        |
| Table S2b.....                                             | 5        |
| <b><i>Supplement S3: Measure Reliability</i></b> .....     | <b>6</b> |
| Table S3a .....                                            | 6        |
| Table S3b.....                                             | 6        |
| <b><i>Supplement S4: Variable Distributions</i></b> .....  | <b>7</b> |
| Figure S4a.....                                            | 7        |
| Figure S4b .....                                           | 8        |
| Table S4a .....                                            | 9        |
| Table S4b.....                                             | 9        |

### **Supplement S1: Sampling**

Initially, 1296 participants were recruited at wave 1 to meet requirements of the broader study design (see Dawel et al., 2020). Qualtrics Research Services used quota sampling to obtain a sample representative of the Australian adult population on the basis of gender, age, and State/Territory. Participants completed demographics questionnaires and measures of cognitive reappraisal, mental health and wellbeing outcomes, and moderator variables at different time points across waves 1 to 8. Each survey took participants approximately 15-25 minutes to complete and Qualtrics Research Services provided a small incentive to participants for their completion. Participants' data were excluded from individual analyses if they were missing one or more variables for a given model. For example, if a participant was missing data for a moderator variable they were excluded from that moderator model but included in other models where they had data available. We took this approach to maximise the amount of data available for each analysis.

### Supplement S2: Post-hoc Power Analyses

We conducted post hoc power analyses for our moderation models to determine the power of our samples to detect small sized full model ( $\rho^2 = .03$ ) and moderation effects (partial  $R^2 = .03$ ). We used G\*Power version 3.1.9.6 (Erdfelder et al., 2009) with power = 0.8 and  $\alpha = .05$ . The required sample size for power at this level varied between models based on the number of independent variables included (including contrast coding levels for categorical moderators; see Table S2a). All models exceeded the required sample size, except wave 8 models with emotion differentiation as moderators. While these models were underpowered, their wave 7 counterparts produce comparable results.

**Table S2a**

*Power Analyses Indicating Required N*

| Models                       | N IVs | N required for full model | N required for moderation interaction |
|------------------------------|-------|---------------------------|---------------------------------------|
| Age as continuous moderator  | 5     | 421                       | 256                                   |
| Age as categorical moderator | 7     | 472                       | 315                                   |
| All other models             | 6     | 447                       | 256                                   |

**Table S2b***Sample Size for Models by Outcome and Moderator*

| Outcome       | Moderator         |                  |                      |             |        |     |                       |                              |                                     |
|---------------|-------------------|------------------|----------------------|-------------|--------|-----|-----------------------|------------------------------|-------------------------------------|
|               | Self-<br>efficacy | Emotion<br>diff. | Diff. ID<br>feelings | Neuroticism | Stress | SES | Analytic<br>reasoning | Age in years<br>(continuous) | Age tercile<br>(young/middle/older) |
| Depression-w7 | 689               | 625              | 734                  | 700         | 736    | 738 | 736                   | 739                          | 733                                 |
| Anxiety-w7    | 684               | 626              | 732                  | 697         | 735    | 738 | 734                   | 740                          | 729                                 |
| Loneliness-w7 | 701               | 634              | 746                  | 708         | 745    | 748 | 747                   | 748                          | 745                                 |
| Impairment-w7 | 686               | 622              | 734                  | 694         | 730    | 737 | 735                   | 737                          | 730                                 |
| Wellbeing-w7  | 691               | 630              | 742                  | 704         | 741    | 743 | 742                   | 745                          | 736                                 |
| Depression-w8 | 470               | 382              | 499                  | 477         | 499    | 502 | 498                   | 503                          | 497                                 |
| Anxiety-w8    | 471               | 382              | 502                  | 476         | 502    | 504 | 499                   | 504                          | 498                                 |
| Loneliness-w8 | 472               | 383              | 504                  | 479         | 502    | 504 | 502                   | 504                          | 502                                 |
| Impairment-w8 | 466               | 377              | 495                  | 475         | 495    | 497 | 497                   | 498                          | 495                                 |
| Wellbeing-w8  | 468               | 381              | 497                  | 474         | 499    | 501 | 499                   | 500                          | 497                                 |

*Note.* The total *N* participants in models where age is included as a continuous versus a categorical (tercile) variable differs because the two models produced different distance cut-off scores and therefore differed slightly in the number of participants excluded as outliers.

**Supplement S3: Measure Reliability**

Tables S3a and S3b present Cronbach's alphas as a measure of reliability for each measure in the wave 7 and 8 samples respectively.

**Table S3a**

*Cronbach's alphas for Wave 7 Sample (N = 752)*

|                                           | $\alpha$ for each wave          |
|-------------------------------------------|---------------------------------|
| ERQ-reappraisal                           | 0.92 (w2), 0.93 (w4), 0.93 (w6) |
| PHQ-9 (depression)                        | 0.92 (w1) 0.94 (w7)             |
| GAD-7 (anxiety)                           | 0.94 (w1) 0.95 (w7)             |
| DJGLS (loneliness)                        | 0.73 (w1) 0.80 (w7)             |
| WSAS (functional impairment)              | 0.74 (w1) 0.84 (w7)             |
| WHO-5 (wellbeing)                         | 0.92 (w1) 0.94 (w7)             |
| Pearlin Mastery (self-efficacy)           | 0.86 (w4)                       |
| TAS-DIF (difficulty identifying feelings) | 0.93 (w1) 0.94 (w7)             |

**Table S3b**

*Cronbach's alphas for Wave 8 Sample (N = 512)*

|                                           | $\alpha$ for each wave          |
|-------------------------------------------|---------------------------------|
| ERQ-reappraisal                           | 0.91 (w2), 0.94 (w4), 0.94 (w6) |
| PHQ-9 (depression)                        | 0.92 (w1) 0.92 (w7)             |
| GAD-7 (anxiety)                           | 0.94 (w1) 0.94 (w7)             |
| DJGLS (loneliness)                        | 0.75 (w1) 0.84 (w7)             |
| WSAS (functional impairment)              | 0.73 (w1) 0.89 (w7)             |
| WHO-5 (wellbeing)                         | 0.92 (w1) 0.94 (w7)             |
| Pearlin Mastery (self-efficacy)           | 0.86 (w4)                       |
| TAS-DIF (difficulty identifying feelings) | 0.94 (w1) 0.94 (w7)             |

Supplement S4: Variable Distributions

Figure S4a

Histograms Showing Distributions for Outcome Variables

Wave 7 sample

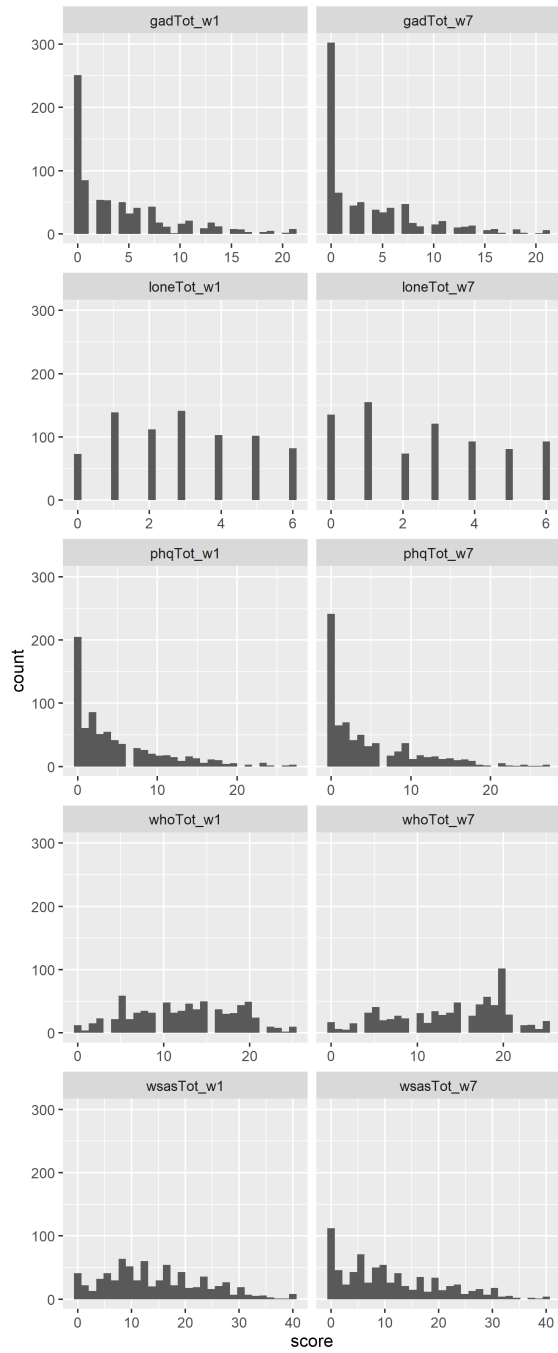

Wave 8 sample

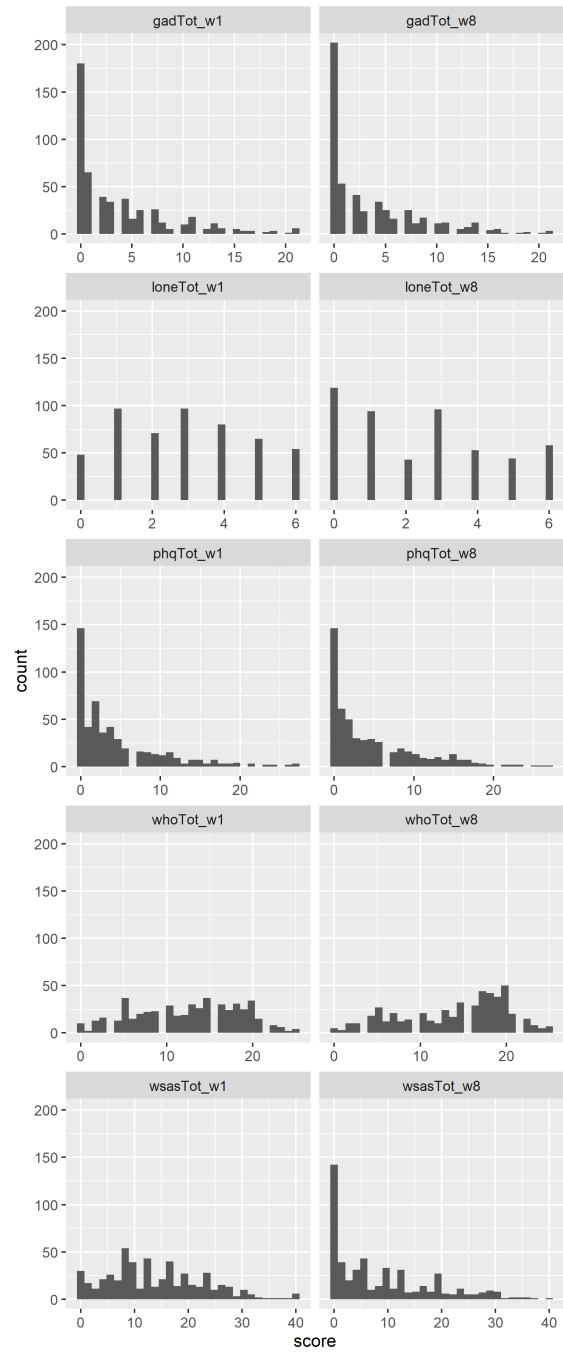

**Figure S4b**

*Histograms Showing Distributions for Predictor (Cognitive Reappraisal) and Continuous and Ordinal Moderator Variables*

*Wave 7 sample*

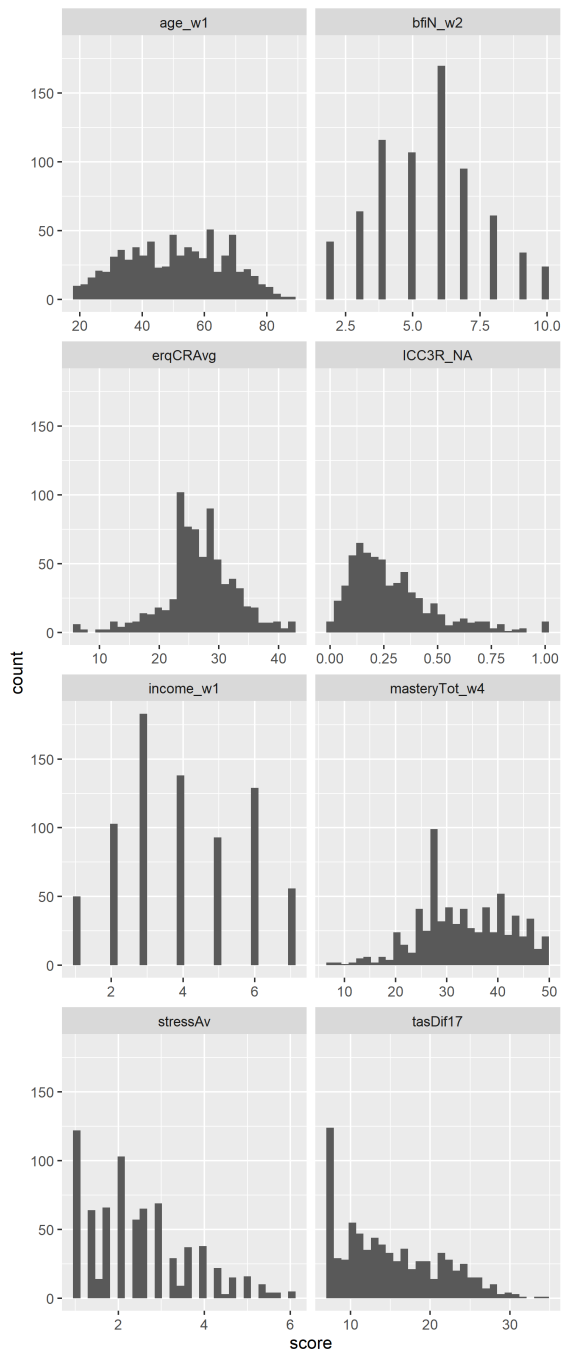

*Wave 8 sample*

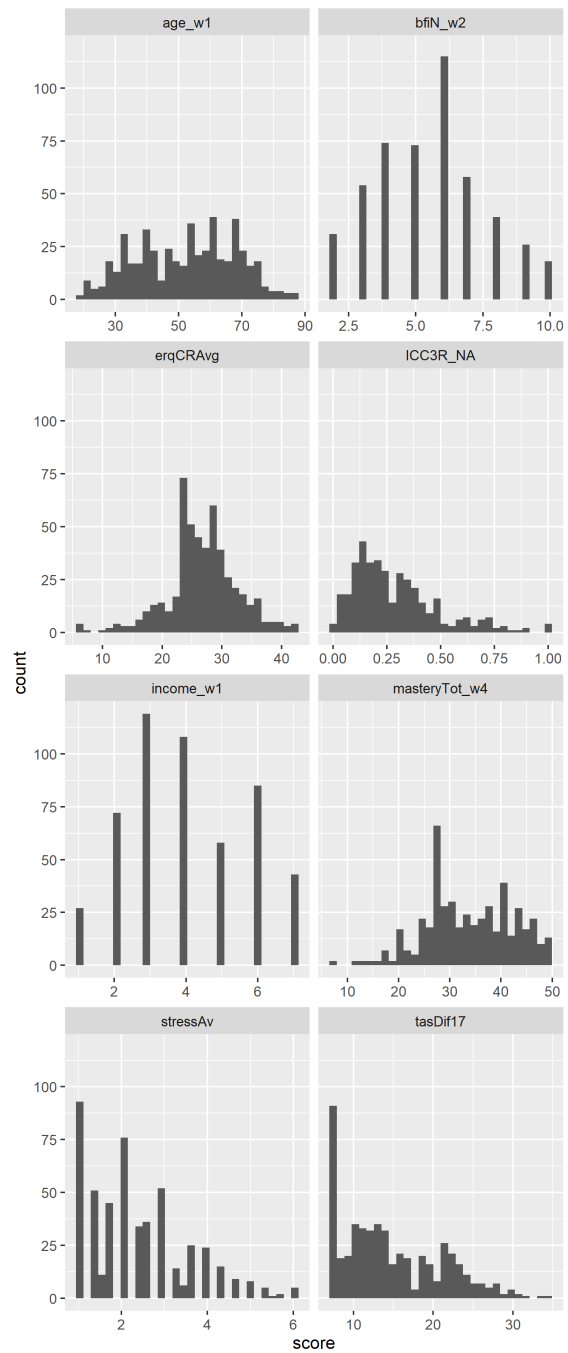



**Table S4a**

*Frequency Counts for Categorical Moderator Variables: Age Terciles*

| Age tercile group | Wave 7 | Wave 8 |
|-------------------|--------|--------|
| Young             | 254    | 169    |
| Middle            | 244    | 164    |
| Older             | 254    | 179    |

**Table S4b**

*Frequency Counts for Categorical Moderator Variables: Cognitive Reflection Task*

| CRT response | Wave 7 | Wave 8 |
|--------------|--------|--------|
| Correct      | 184    | 121    |
| Incorrect    | 568    | 391    |
